# Supplementary material
Source: publisher figshare collection journal article supplement (https://diabetesjournals.figshare.com/articles/dataset/_/14403269)
Supplement: Supplementary file 1 [file 1]

Supplementary Figure S1: Device guide.

Insurance coverage for devices may vary.

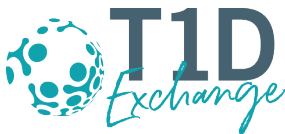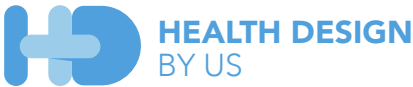

| PRODUCT                                                                                                                                | STEPS TO USE                                                                                                                               | UPKEEP                                                                                                                                             | VISIBILITY                                                                                                      | ALERTS                                                                                                                                     | LINK TO PHONE?                                                                                                                              | CAREGIVER SHARING?                                                                                                      | COMPATIBLE WITH PUMP?                                                                                                     | BASAL ADJUSTMENTS?                                                                                                                                                                     | DATA VIEWING?                                                                                                                                                                      | DATA AVAILABLE?                                                                              |
|----------------------------------------------------------------------------------------------------------------------------------------|--------------------------------------------------------------------------------------------------------------------------------------------|----------------------------------------------------------------------------------------------------------------------------------------------------|-----------------------------------------------------------------------------------------------------------------|--------------------------------------------------------------------------------------------------------------------------------------------|---------------------------------------------------------------------------------------------------------------------------------------------|-------------------------------------------------------------------------------------------------------------------------|---------------------------------------------------------------------------------------------------------------------------|----------------------------------------------------------------------------------------------------------------------------------------------------------------------------------------|------------------------------------------------------------------------------------------------------------------------------------------------------------------------------------|----------------------------------------------------------------------------------------------|
| <b>METER</b><br>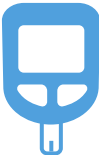                                      | <ul style="list-style-type: none"><li>• Prepare meter</li><li>• Poke finger</li><li>• Check reading</li></ul>                              | Carry supplies at all times                                                                                                                        | 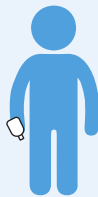<br>Pull out supplies         | 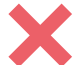                                                        | 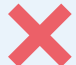<br>Some meters have mobile apps that link via Bluetooth | 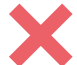                                     | 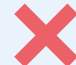                                       | 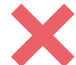                                                                                                    | 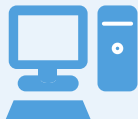<br>Plug into PC to upload data                                                                 | Individual BG checks show whether BG is high, low, or in range                               |
| <b>CGM</b><br>Abbott FreeStyle Libre 2<br>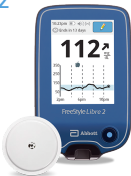            | <ul style="list-style-type: none"><li>• Wave reader or compatible phone over sensor</li><li>• Check reading **</li></ul>                   | <ul style="list-style-type: none"><li>• Change sensor every 14 days</li><li>• Charge reader</li></ul>                                              | 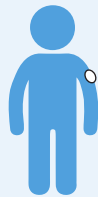<br>Sensor attached to body   | 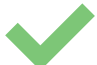<br>Optional, customizable for highs and lows           | 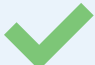<br>Reader available for iOS and some Android devices    | 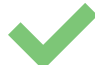<br>Via Libre LinkUp app             | 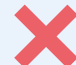                                       | 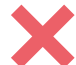                                                                                                    | 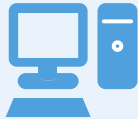<br>Scan sensor every 8 hours, plug into PC to upload data to LibreView                         | Measure glucose once per minute, shows current glucose, trend arrows, and graph of past data |
| <b>CGM</b><br>Medtronic Guardian Connect System<br>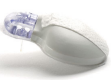 | <ul style="list-style-type: none"><li>• Check iOS device for glucose level **</li><li>• Calibrate with meter 2x per day</li></ul>          | <ul style="list-style-type: none"><li>• Change sensor every 6-7 days</li><li>• Charge transmitter</li></ul>                                        | 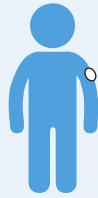<br>Sensor attached to body  | 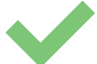<br>Customizable for highs and lows (not severe lows)   | 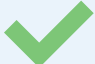<br>Real-time view for iOS devices                       | 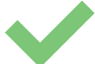<br>Via CareLink Connect app for iOS | 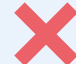                                       | 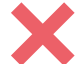                                                                                                    | 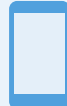<br>Mobile app uploads data to CareLink web app every night                                     | Shows current glucose, trend arrows, and graph of past data                                  |
| <b>CGM</b><br>Medtronic Guardian Sensor 3<br>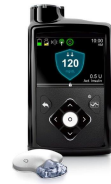       | <ul style="list-style-type: none"><li>• Check connected 670G pump for glucose level **</li><li>• Calibrate with meter 2x per day</li></ul> | <ul style="list-style-type: none"><li>• Change sensor every 6-7 days</li><li>• Charge transmitter</li></ul>                                        | 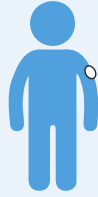<br>Sensor attached to body | 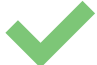<br>Customizable for highs and lows (not severe lows) | 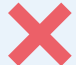                                                       | 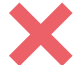                                   | 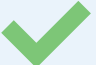<br>Medtronic 630G<br>Medtronic 670G | 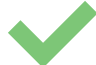<br>Connects to Medtronic 670G for auto-dosing and 630G for low glucose suspend                   | 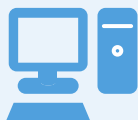<br>Plug into PC to upload data to CareLink                                                   | Shows current glucose, trend arrows, and graph of past data                                  |
| <b>CGM</b><br>Dexcom G6<br>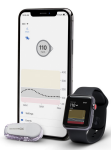                         | <ul style="list-style-type: none"><li>• Check phone or receiver for glucose level **</li></ul>                                             | <ul style="list-style-type: none"><li>• Change sensor every 10 days</li><li>• Charge receiver</li><li>• Change transmitter every 90 days</li></ul> | 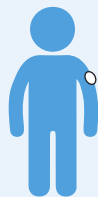<br>Sensor attached to body | 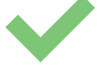<br>Customizable for highs and lows (not severe lows) | 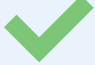<br>Real-time view for iOS and Android                 | 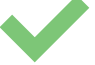<br>Via Follow app                 | 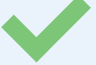<br>Tandem t:slim X2                 | 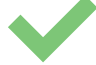<br>Connects to Tandem t:slim X2; Control IQ for auto-dosing and Basal IQ for low glucose suspend | 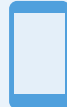<br>Mobile phone view, data transmits to Dexcom Clarity; plug receiver into PC to upload data | Shows current glucose, trend arrows, and graph of past data                                  |

\*\* Must use a blood glucose meter to verify low blood glucose or when symptoms do not match CGM reading
